# Supplementary material
Source: publisher figshare collection journal article supplement (https://frontiersin.figshare.com/ndownloader/files/19238780)
Supplement: Supplementary file [file 19238780]

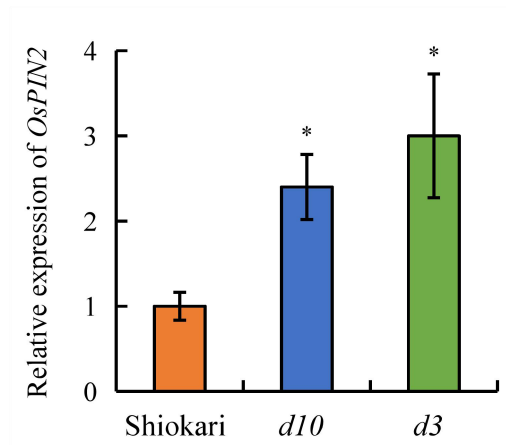

**Supplementary FIGURE 1** qRT-PCR analysis of *OsPIN2* gene in the roots of wild-type (WT) and strigolactone-deficient (*d10*) and strigolactone-insensitive (*d3*) mutant rice plants. Seedlings were grown in a hydroponic media for 21 days. Data are means  $\pm$  SE. \*,  $P < 0.05$  comparing the WT and other rice plants.

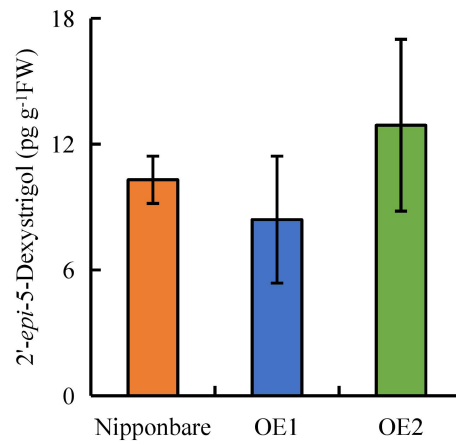

**Supplementary FIGURE 2** Levels of 2'-*epi*-5-Deoxystrigol in wild-type (WT, Nipponbare) and overexpression of *OsPIN2* lines (OE). Seedlings were grown in a hydroponic media for 21 days. Data are means  $\pm$  SE. \*,  $P < 0.05$  comparing the WT and other rice plants.

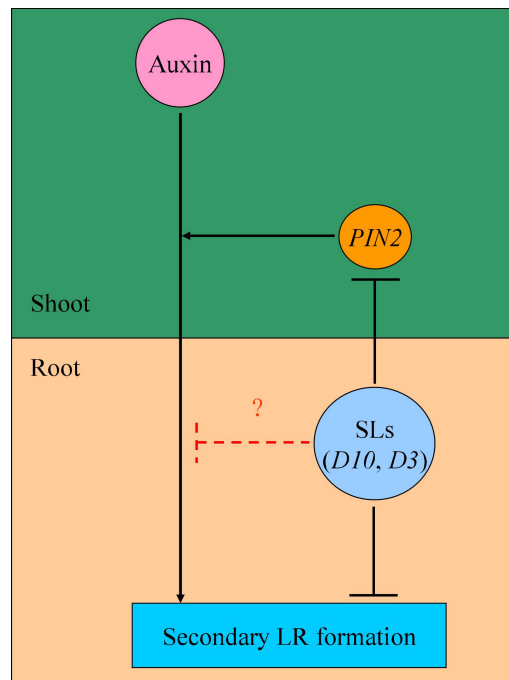

**Supplementary FIGURE 3** Summary of the interactions between auxin and strigolactones (SLs)/strigolactones signalling regulate secondary LR formation in rice. The arrow represents promotion. The horizontal line represents inhibition. The dotted red line represents the unknown.
